# Supplementary material
Source: MDPI journal article supplement (https://www.mdpi.com/2071-1050/14/8/4670)
Supplement: s1 [file s1]

## Supplementary Materials

**Table S1.** Linkage of landcover classes available in CORINE data and SWAT model. Details of the SWAT classes are available in SWAT Model Database Appendix A (<https://swat.tamu.edu/media/69419/Appendix-A.pdf>, accessed on 1 March 2022).

| Sl. | Landcover CODE | Landcover description                                                                  | SWAT class | Sl. | Landcover CODE | Landcover description       | SWAT class |
|-----|----------------|----------------------------------------------------------------------------------------|------------|-----|----------------|-----------------------------|------------|
| 1   | 111            | Continuous urban fabric                                                                | URBN       | 23  | 311            | Broad-leaved forest         | FRSD       |
| 2   | 112            | Discontinuous urban fabric                                                             | URML       | 24  | 312            | Coniferous forest           | FRSE       |
| 3   | 121            | Industrial or commercial units                                                         | UCOM       | 25  | 313            | Mixed forest                | FRST       |
| 4   | 122            | Road and rail networks and associated land                                             | UTRN       | 26  | 321            | Natural grasslands          | RNGE       |
| 5   | 123            | Port areas                                                                             | UTRN       | 27  | 322            | Moors and heathland         | RNGB       |
| 6   | 124            | Airports                                                                               | UTRN       | 28  | 323            | Sclerophyllous vegetation   | RNGB       |
| 7   | 131            | Mineral extraction sites                                                               | SWRN       | 29  | 324            | Transitional woodland-shrub | RNGB       |
| 8   | 132            | Dump sites                                                                             | UIDU       | 30  | 331            | Beaches, dunes, sands       | WETN       |
| 9   | 133            | Construction sites                                                                     | UIDU       | 31  | 332            | Bare rocks                  | BARR       |
| 10  | 141            | Green urban areas                                                                      | RNGE       | 32  | 333            | Sparsely vegetated areas    | BARR       |
| 11  | 142            | Sport and leisure facilities                                                           | UCOM       | 33  | 334            | Burnt areas                 | BARR       |
| 12  | 211            | Non-irrigated arable land                                                              | AGRL       | 34  | 335            | Glaciers and perpetual snow | WATR       |
| 13  | 212            | Permanently irrigated land                                                             | AGRL       | 35  | 411            | Inland marshes              | WETN       |
| 14  | 213            | Rice fields                                                                            | RICE       | 36  | 412            | Peat bogs                   | WETL       |
| 15  | 221            | Vineyards                                                                              | GRAP       | 37  | 421            | Salt marshes                | WETL       |
| 16  | 222            | Fruit trees and berry plantations                                                      | AGRL       | 38  | 422            | Salines                     | WETL       |
| 17  | 223            | Olive groves                                                                           | OLIV       | 39  | 423            | Intertidal flats            | WETL       |
| 18  | 231            | Pastures                                                                               | PAST       | 40  | 511            | Water courses               | WATR       |
| 19  | 241            | Annual crops associated with permanent crops                                           | AGRL       | 41  | 512            | Water bodies                | WATR       |
| 20  | 242            | Complex cultivation patterns                                                           | AGRL       | 42  | 521            | Coastal lagoons             | WATR       |
| 21  | 243            | Land principally occupied by agriculture, with significant areas of natural vegetation | AGRL       | 43  | 522            | Estuaries                   | WATR       |
| 22  | 244            | Agro-forestry areas                                                                    | FRST       | 44  | 523            | Sea and ocean               | WATR       |

**Table S2.** Location of Met Eireann rain (R) gauges, temperature (T) gauges and weather stations measuring relative humidity (RH), wind speed (WS) and solar radiation (SR) in and around Dodder river basin. Stations located inside the Dodder river basin are highlighted in bold.

| Gauge Number | Location details |        | Data Range            | Available Variables |
|--------------|------------------|--------|-----------------------|---------------------|
|              | Lat              | Lon    |                       |                     |
| S175         | 53.364           | -6.350 | 16/08/2003-31/12/2020 | R, T, RH, WS, SR    |
| S1823        | 53.370           | -6.270 | 01/01/1984-31/10/2020 | R, T                |
| <b>S1923</b> | 53.239           | -6.367 | 01/01/1984-30/09/2014 | R                   |
| S3723        | 53.306           | -6.439 | 01/01/1964-31/10/2020 | R, T, RH, WS, SR    |
| S3923        | 53.341           | -6.253 | 01/01/1948-31/10/2020 | R, T                |
| <b>S5623</b> | 53.239           | -6.364 | 01/10/1959-31/10/2020 | R                   |
| <b>S6623</b> | 53.276           | -6.304 | 01/02/1967-31/10/2020 | R                   |
| S7523        | 53.325           | -6.225 | 01/08/1972-28/02/2015 | R                   |

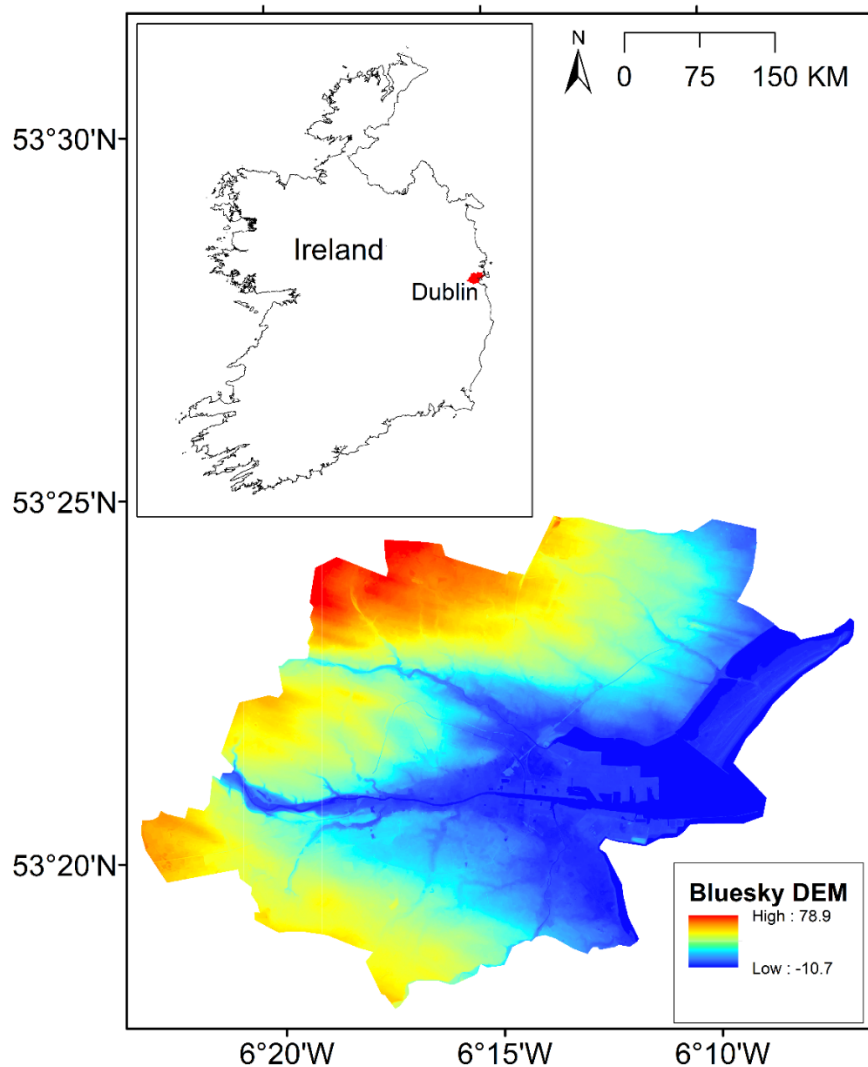

**Figure S1.** Digital Elevation Model data for Dublin city obtained from Bluesky at 1 meter spatial resolution.
